# Supplementary material for: The impact of early PEG-asparaginase discontinuation in young adults with ALL: a post hoc analysis of the CALGB 10403 study
Source: PubMed Central journal article supplement — Blood Adv. 2022 Oct 27;7(2):196–204. doi: 10.1182/bloodadvances.2022007791 (PMC9841239; doi:10.1182/bloodadvances.2022007791), 2022-10-27
Supplement: BLOODA_ADV-2022-007791-mmc1.pdf [file BLOODA_ADV-2022-007791-mmc1.pdf]

**Supplementary Table 1.** Multivariate analysis for OS including PEG-asparaginase dose as a continuous variable

| Explanatory                                          | HR   | L95   | U95    | p-value |
|------------------------------------------------------|------|-------|--------|---------|
| PEG-asparaginase doses as a continuous variable      | 0.88 | 0.710 | 1.0997 | 0.26777 |
| Age_ $\geq$ 30 years vs. < 30 years                  | 1.66 | 0.789 | 3.4810 | 0.18189 |
| Cytogenetics_ Unavailable vs. Favorable              | 0.63 | 0.137 | 2.8811 | 0.55060 |
| Cytogenetics_ Unfavorable/Intermediate vs. Favorable | 0.67 | 0.145 | 3.0683 | 0.60412 |
| Ph-like_ Unavailable vs. No                          | 1.51 | 0.668 | 3.3972 | 0.32394 |
| Ph-like_ Yes vs. No                                  | 2.81 | 1.044 | 7.5378 | 0.04073 |
| WBC_ >30 vs. $\leq$ 30                               | 1.71 | 0.812 | 3.5963 | 0.15780 |
| BMI_ $\geq$ 30 vs. 30                                | 1.11 | 0.536 | 2.3018 | 0.77757 |
| MRD post induction_ Unavailable vs. detectable       | 0.78 | 0.336 | 1.8301 | 0.57435 |
| MRD post induction _ Undetectable vs. detectable     | 0.44 | 0.111 | 1.7575 | 0.24610 |

Ph-like: Philadelphia-like; WBC: white blood cell count; BMI: body mass index; MRD: measurable residual disease

**Supplementary Table 2.** Multivariate analysis for EFS including PEG-asparaginase dose as a continuous variable

| explanatory                                          | HR   | L95   | U95    | p-value |
|------------------------------------------------------|------|-------|--------|---------|
| PEG-asparaginase doses as a continuous variable      | 0.97 | 0.811 | 1.1711 | 0.78315 |
| Age_ $\geq$ 30 years vs. < 30 years                  | 1.62 | 0.856 | 3.0464 | 0.13865 |
| Cytogenetics_ Unavailable vs. Favorable              | 1.07 | 0.243 | 4.7256 | 0.92747 |
| Cytogenetics_ Unfavorable/Intermediate vs. Favorable | 1.00 | 0.227 | 4.3895 | 0.99847 |
| Ph-like_ Unavailable vs. No                          | 1.37 | 0.700 | 2.6665 | 0.36050 |
| Ph-like_ Yes vs. No                                  | 3.42 | 1.518 | 7.7151 | 0.00302 |
| WBC_ >30 vs. $\leq$ 30                               | 1.56 | 0.847 | 2.8727 | 0.15400 |
| BMI_ $\geq$ 30 vs. 30                                | 1.19 | 0.646 | 2.1885 | 0.57741 |
| MRD post induction_ Unavailable vs. detectable       | 0.72 | 0.352 | 1.4694 | 0.36575 |
| MRD post induction _ Undetectable vs. detectable     | 0.41 | 0.127 | 1.3480 | 0.14310 |

Ph-like: Philadelphia-like; WBC: white blood cell count; BMI: body mass index; MRD: measurable residual disease

**Supplementary Figure 1.** Progression by number of PEG-asparaginase doses

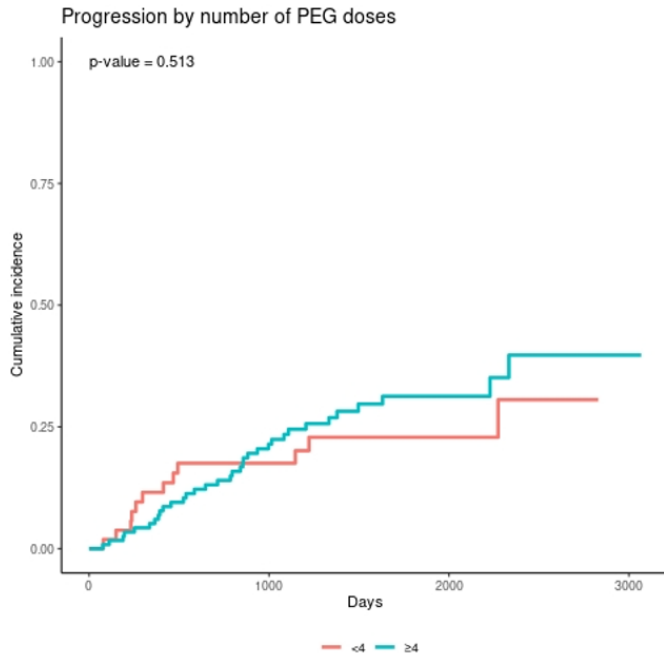

**Supplementary Figure 2A.** OS for younger patients based on number of pegasparaginase doses

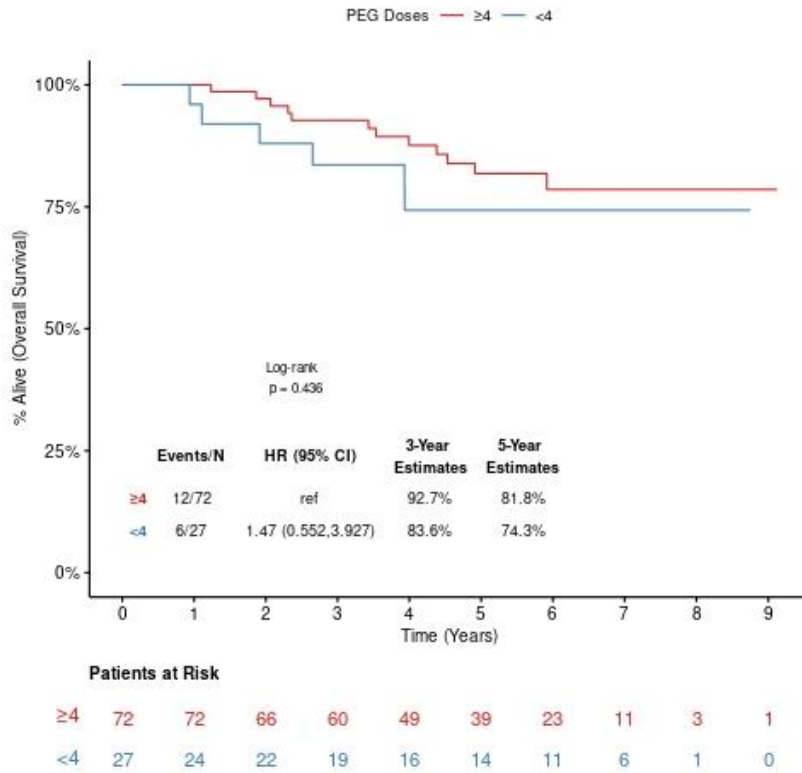

**Supplementary Figure 2B.** EFS for younger patients based on number of pegasparginase doses

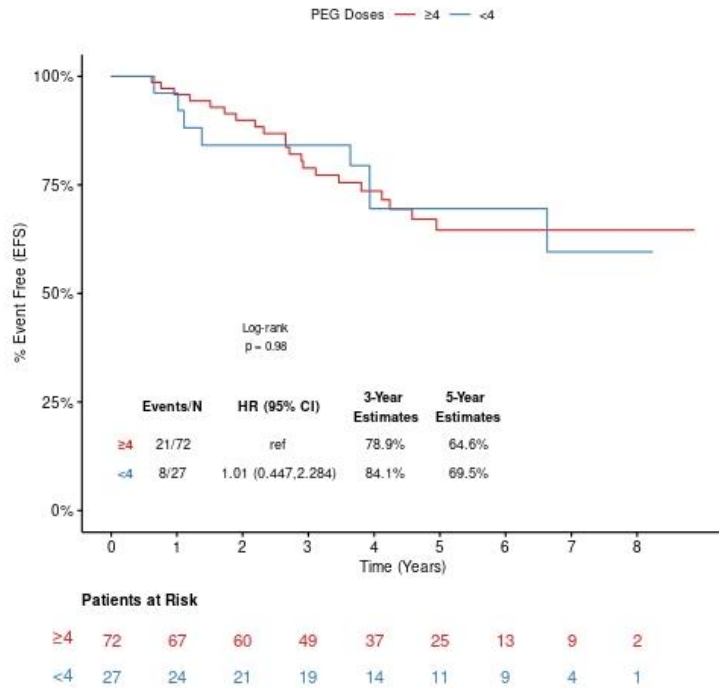

**Supplementary Figure 2C.** OS for older patients based on number of pegasparginase doses

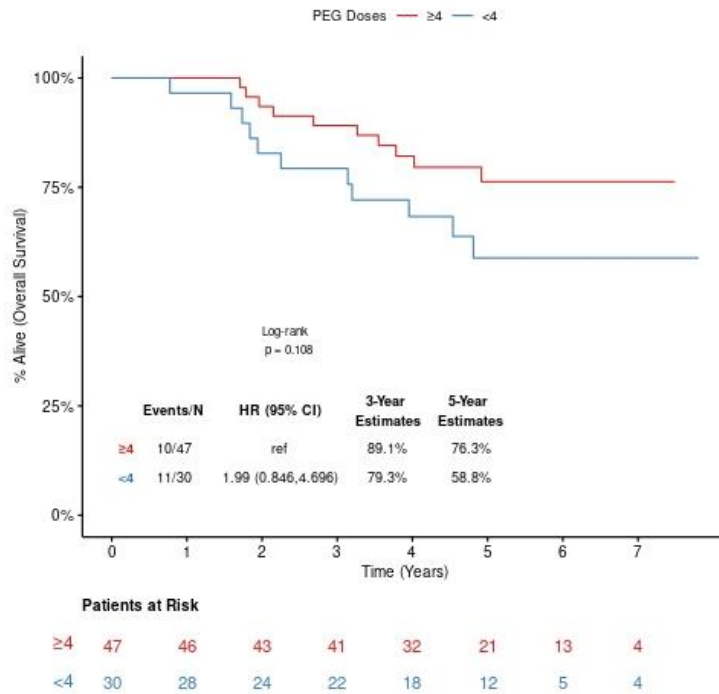

**Supplementary Figure 2D.** EFS for older patients based on number of pegasparginase doses

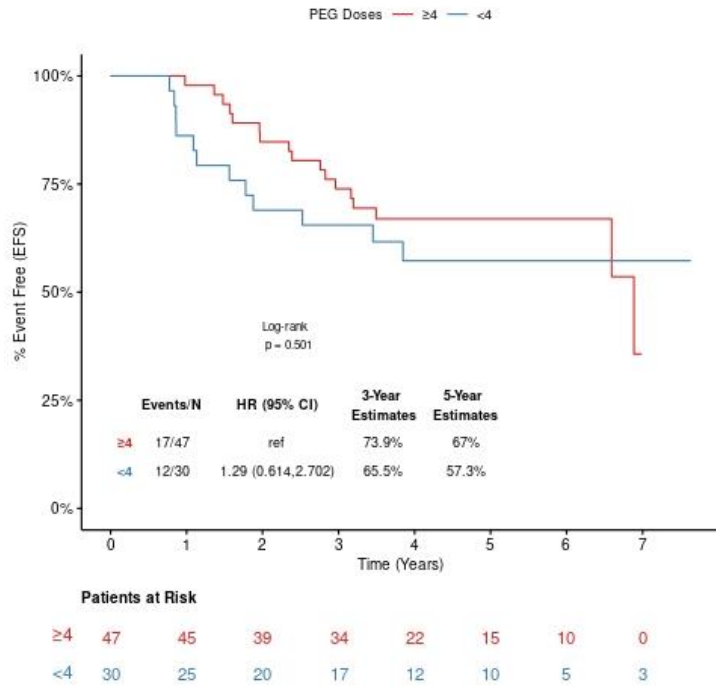

**Supplementary Figure 3A.** OS for patients with low or normal BMI based on number of pegasparginase doses

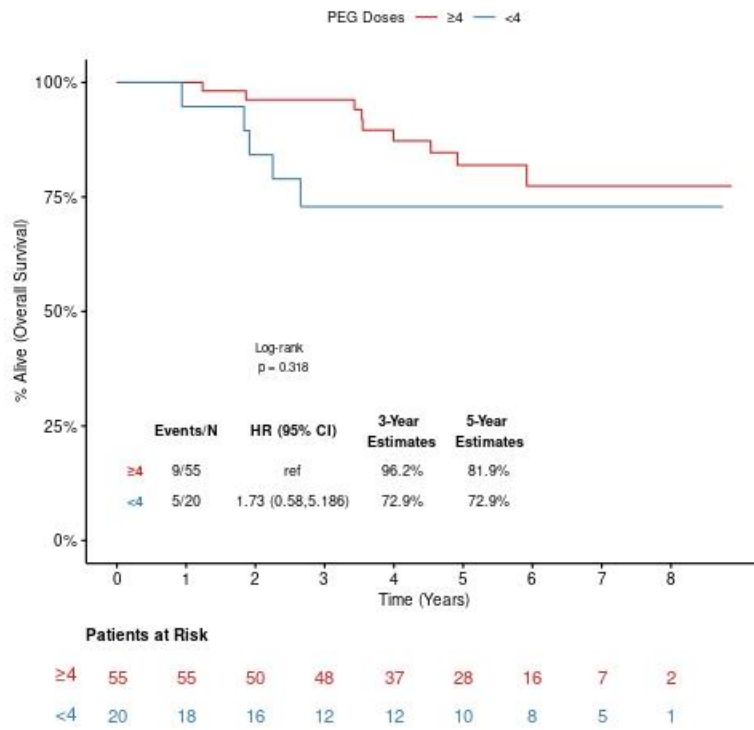

**Supplementary Figure 3B.** EFS for patients with low or normal BMI based on number of pegasparginase doses

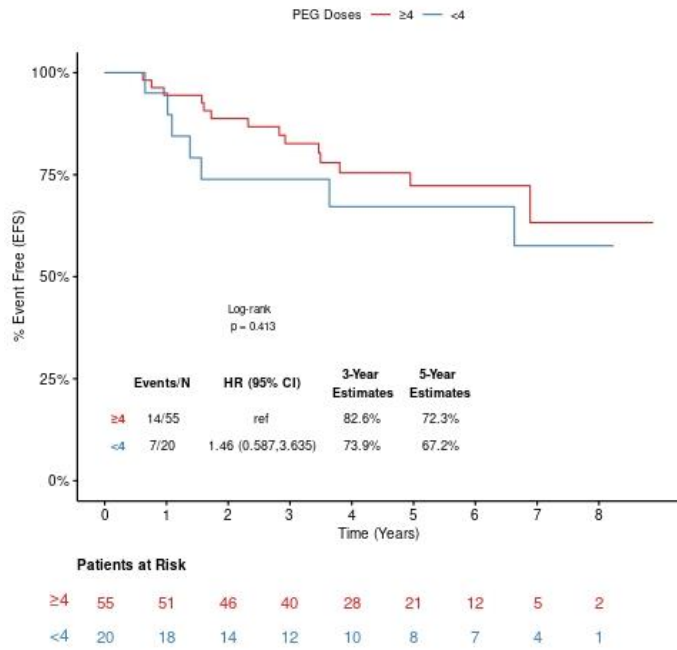

**Supplementary Figure 3C.** OS for patients with high BMI based on number of pegasparginase doses

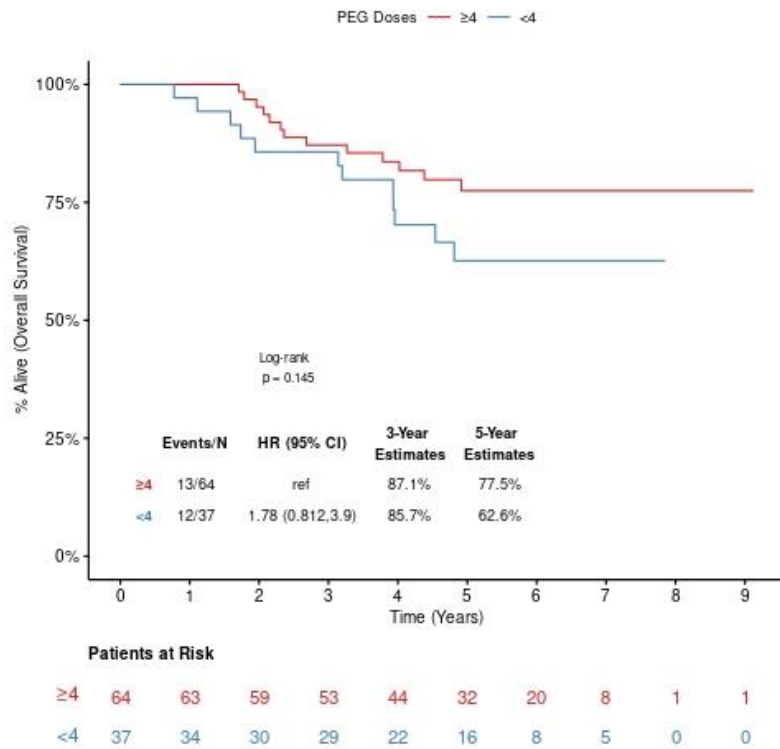

**Supplementary Figure 3D.** EFS for patients with high BMI based on number of pegasparginase doses

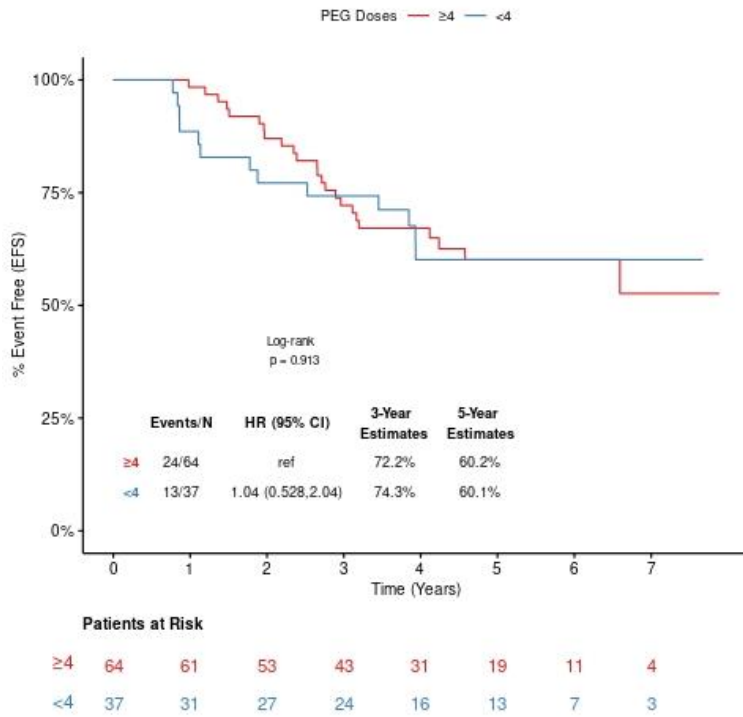

**Supplementary Figure 4A.** OS for patients with detectable MRD based on number of pegasparginase doses

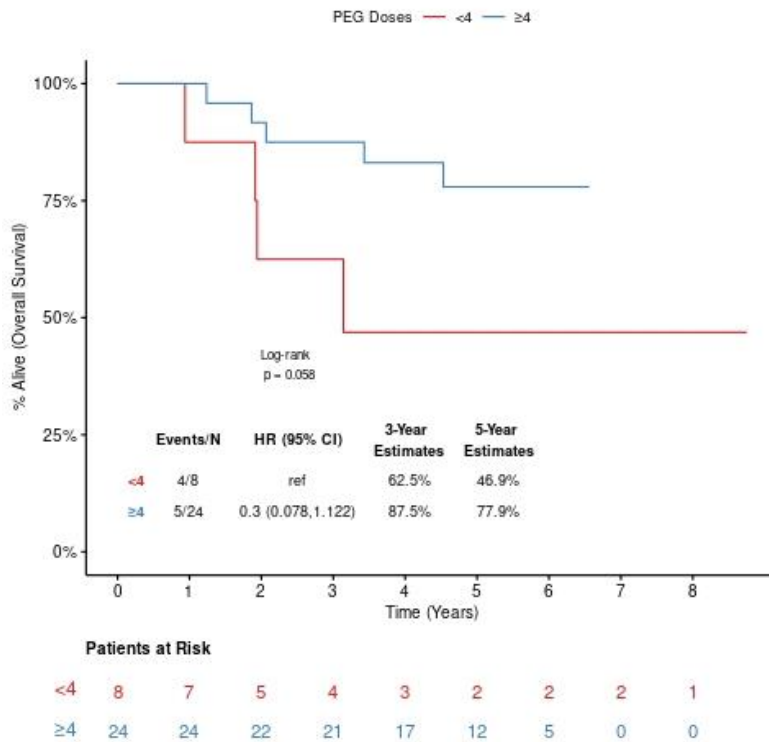

**Supplementary Figure 4B.** EFS for patients with detectable MRD based on number of pegasparginase doses

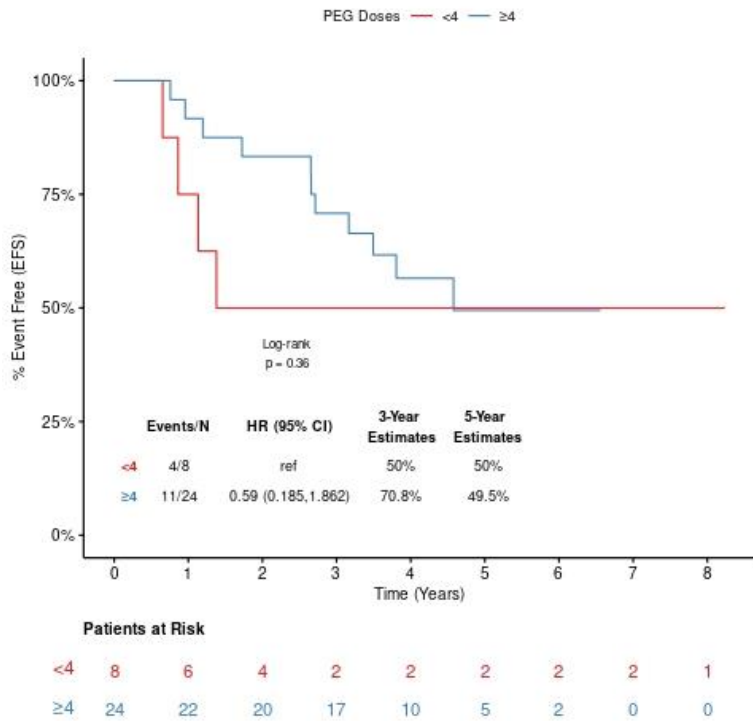

**Supplementary Figure 4C.** OS for patients with undetectable MRD based on number of pegasparginase doses

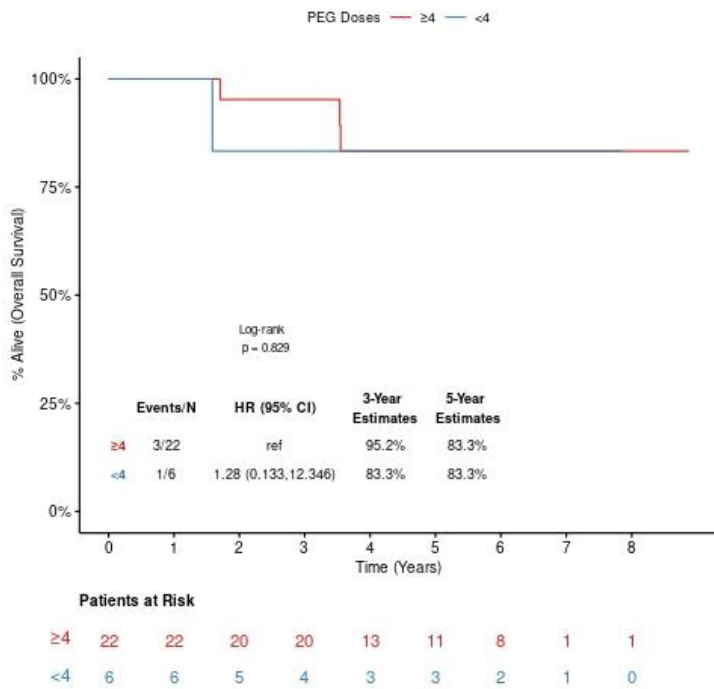

**Supplementary Figure 4D.** EFS for patients with undetectable MRD based on number of pegasparginase doses

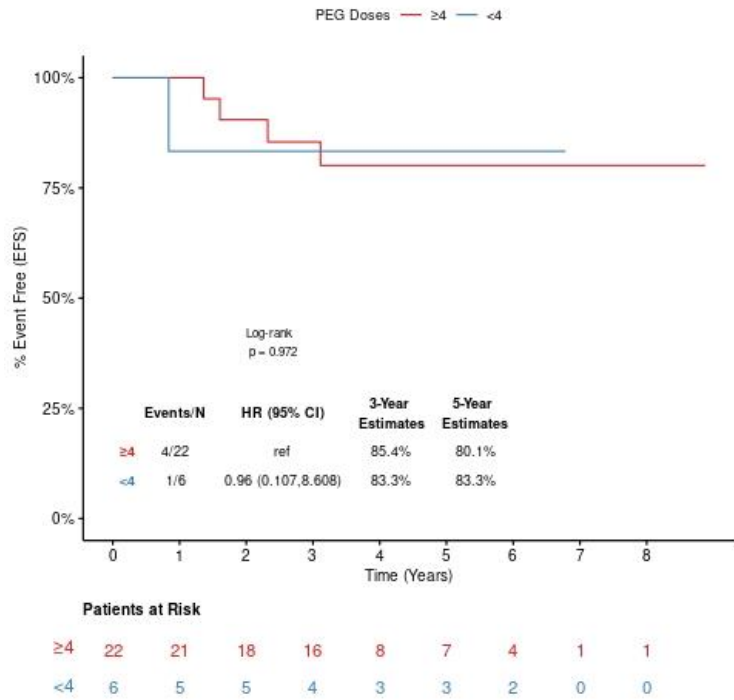

**Supplementary Figure 5A.** OS excluding patients with hypersensitivity

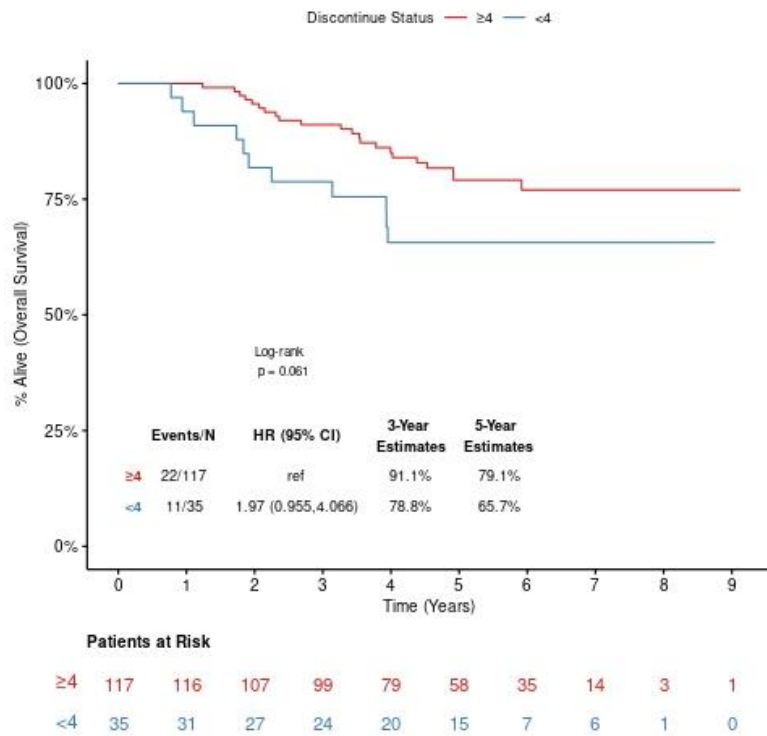



**Supplementary Figure 5B.** EFS excluding patients with hypersensitivity

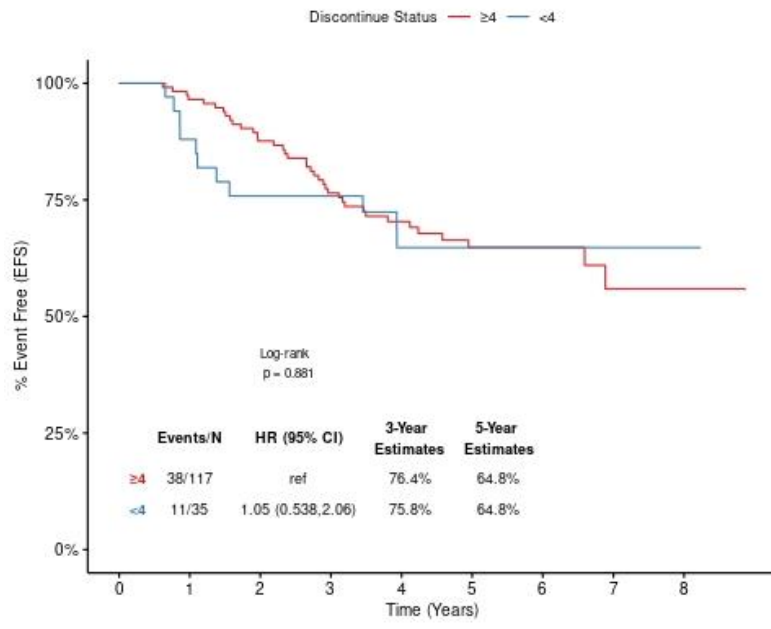

**Patients at Risk**

|          |     |     |    |    |    |    |    |   |   |
|----------|-----|-----|----|----|----|----|----|---|---|
| $\geq 4$ | 117 | 110 | 97 | 81 | 57 | 38 | 22 | 8 | 2 |
| $< 4$    | 35  | 29  | 25 | 23 | 17 | 12 | 6  | 5 | 1 |
